# Supplementary material
Source: MDPI journal article supplement (https://www.mdpi.com/2073-4433/13/5/811)
Supplement: s1 [file s1 › atmosphere-1695987-supplementary.pdf]

Supplementary Materials

# Air Pollution Dispersion over Durban, South Africa

Mark R. Jury and Mandisa Buthelezi

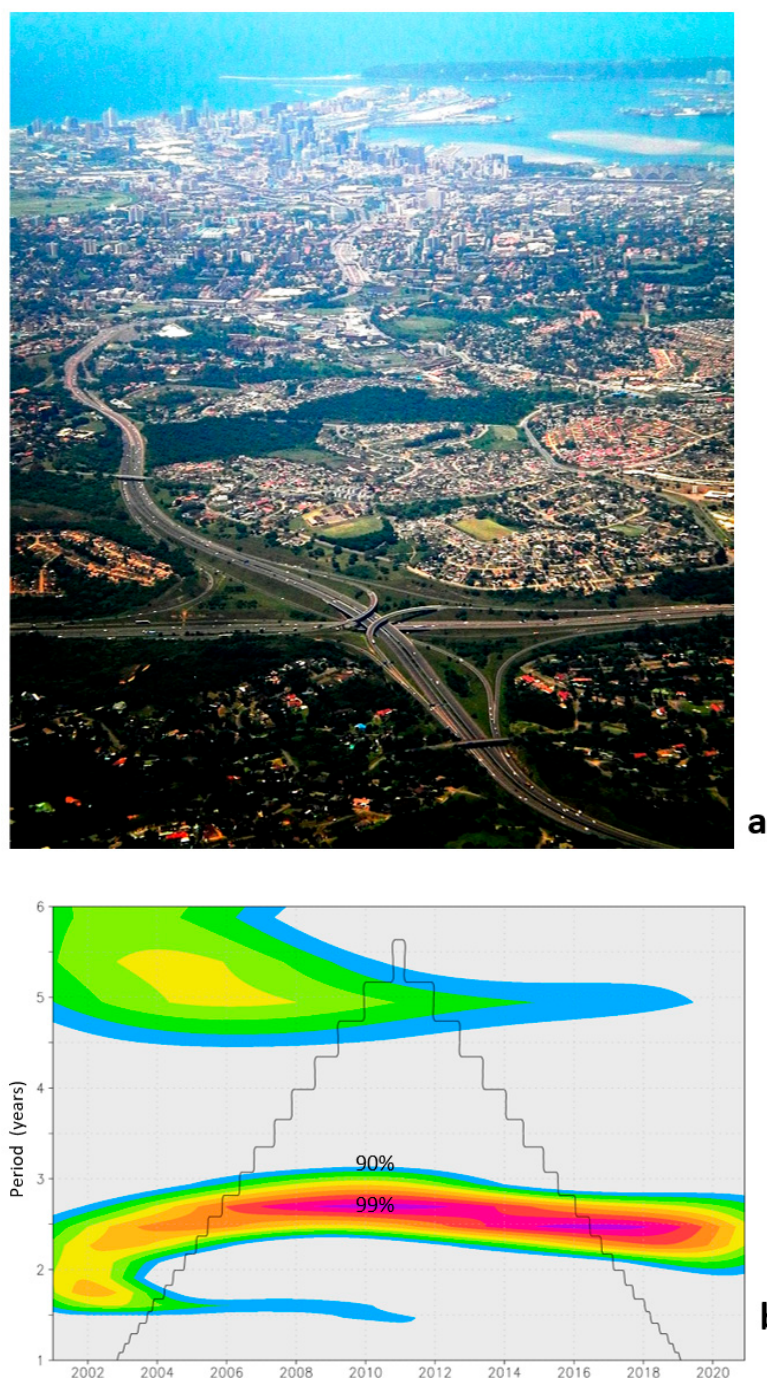

**Figure S1.** (a) Aerial photo of Durban looking southeastward above the intersection of N-2 and N-3 highways. Reprinted from ref. [61] (b) Wavelet analysis of inter-annual filtered Durban-area API: reflecting ~2.5 & 5 yr cycles within the cone of validity. Spectral energy shaded from 90 to 99% confidence.

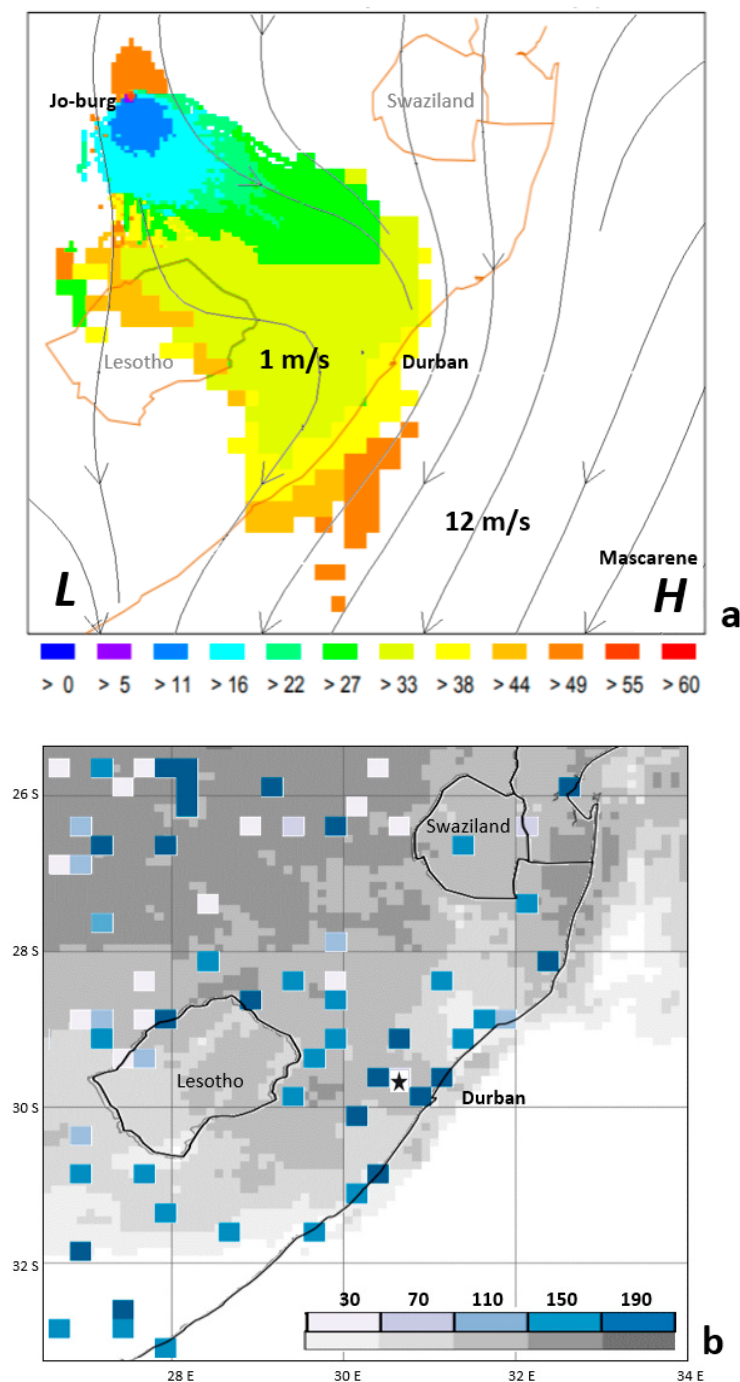

**Figure S2.** (a) Plume arrival time in hours during a top-10 day of Durban-area API, based on a HYSPLIT dispersion simulation of virtual emissions from the Highveld near Johannesburg (30–31 July 2009). Prefrontal weather of > 36 hr duration brings air pollution from the interior. Objectively analyzed 850 hPa wind streamlines are superimposed and min/max speeds are labelled. (b) Long-term mean surface reporting frequency: grey-shaded 3<sup>rd</sup> order stations and ships, blue squares 2<sup>nd</sup> order stations (#/month) from SAWS, star is the station used for dewpoint validation (Figure S3c).

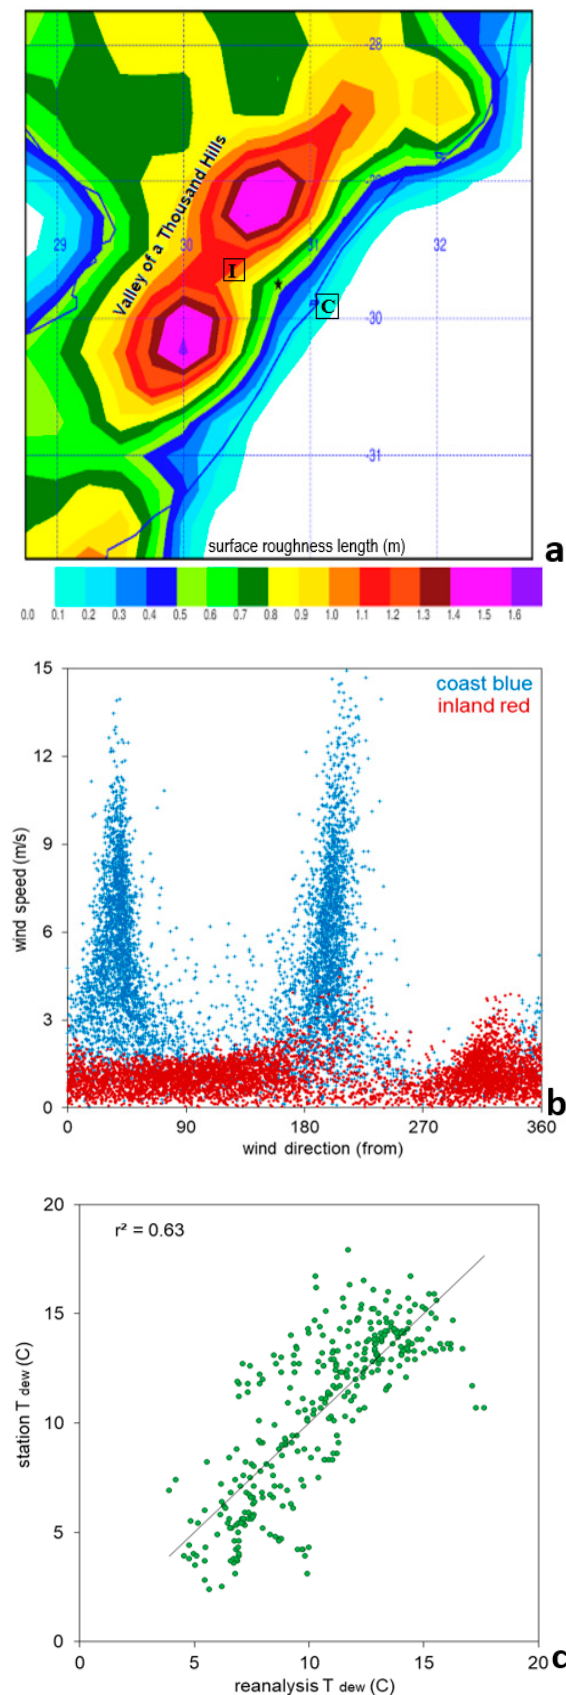

**Figure S3.** (a) Surface roughness parameterization at 25 km resolution over KZN. (b) Scatterplot of daily ERA5 surface wind speed & direction: inland 29.6°S, 30.4°E vs coast 29.9°S, 31°E (2005–2020) at I & C on map (N=5840). (c) Comparison of 10–24 July 2015 hourly dewpoint temperature station vs ERA5 reanalysis with linear fit at \* on map (N=360).
